# Supplementary material for: In situ self-catalyzed formation of core–shell LiFePO4@CNT nanowires for high rate performance lithium-ion batteries
Source: Royal Society of Chemistry journal article supplement (doi:10.1039/c3ta11262d), 2013-01-01
Supplement: c3ta11262d.pdf [file c3ta11262d.pdf]

**Supporting Online Materials for**

**In-situ Self-catalyzed Formation of Core-shell  
LiFePO<sub>4</sub>@CNTs Nanowire for High Rate  
Performance Lithium-ion Batteries**

*Jinli Yang,<sup>1</sup> Jiajun Wang,<sup>1</sup> Yongji Tang,<sup>1,2</sup> Dongniu Wang,<sup>1,2</sup> Biwei Xiao,<sup>1</sup> Xifei Li,<sup>1</sup>*

*Ruying Li,<sup>1</sup> Guoxian Liang,<sup>3</sup> Tsun-Kong Sham,<sup>2</sup> and Xueliang Sun\*<sup>1</sup>*

<sup>1</sup>Department of Mechanical and Materials Engineering and <sup>2</sup>Department of Chemistry,  
Western University, London, Ontario N6A 5B9, Canada

<sup>3</sup>Clariant (Canada), 1475, Marie-Victorin, St-Bruno, Quebec J3V 6B7, Canada

## Experimental part

### Synthesis of LFP@CNTs composites

The following describes a typical synthesis for LFP@CNTs composites. First: 100 mg PMMA was dissolved in 30 mL of water via strong ultrasonic agitation. Next, 1.039 lithium dihydrogen phosphate ( $\text{LiH}_2\text{PO}_4$ , Sigma) was dissolved in 100 mL of water and stirred at 70 °C for 1 h. Separately, 1.739 M iron (II) acetate ( $\text{Fe}(\text{AC})_2$ , Sigma) dissolved in 80 ml of water by stirring at 60 °C for 1 h. The three solutions were mixed together and dried at 70 °C for 24 h. After thorough grinding of the xerogel followed by annealing in a furnace filled with an argon atmosphere at 700 °C for 5 h, 10 h and 20 h with a heating rate of 10 °C  $\text{min}^{-1}$ , the core shell LFP@CNTs composites were obtained.

### Characterization

The synthesized material was then characterized by various methods. Powder X-ray diffraction (XRD, Rigaku, Japan) using a Co Ka radiation source was used to identify the crystalline phase. FE-SEM (S-4800, Hitachi) with an operating voltage of 5 kV, TEM (H-7000, Hitachi) and HRTEM (JEOL 2010F) was used to determine the morphology and microstructure of the samples. A Raman scattering spectroscopy apparatus (HORIBA) equipped with a 532.4 nm laser was performed to study the phonon modes of Fe, P, O and C.  $\text{N}_2$  adsorption/desorption isotherms were performed using a Folio Micromeritics TriStar II Surface Area Analyser. The Fe K-edge XANES spectra were obtained on the Soft X-ray Microcharacterization Beamline (SXRMB,  $\Delta E/E: 10^{-4}$ ), and C K-edge were conducted on the undulator Spherical Grating Monochromator (SGM) beamline at the Canadian Light Source (CLS) located at the University of Saskatchewan in Saskatoon.

### Electrochemical Measurements

The electrochemical cell used in our study was a CR2032 coin cell. The electrolyte used in our experiment was 1 M  $\text{LiPF}_6$  in a mixture of ethylene carbonate/dimethyl carbonate (1: 1 v/v) solvents. All electrochemical tests were performed in an Arbin BT-2000 Battery Test Station within a voltage range of 2.5-4.2 V (versus  $\text{Li}^+/\text{Li}$ ). The composites were mixed with acetylene black and poly-(vinylidene fluoride) (PVDF)

binder with a weight ratio of 75:15:10, using N-methyl-2-pyrrolidone (NMP) as the solvent, and then the mixture was ground in a mortar and pestle and pasted onto pure Al foils. The coin cells were assembled in a high-purity argon filled glove box, and all of the electrochemical measurements were conducted at room temperature.

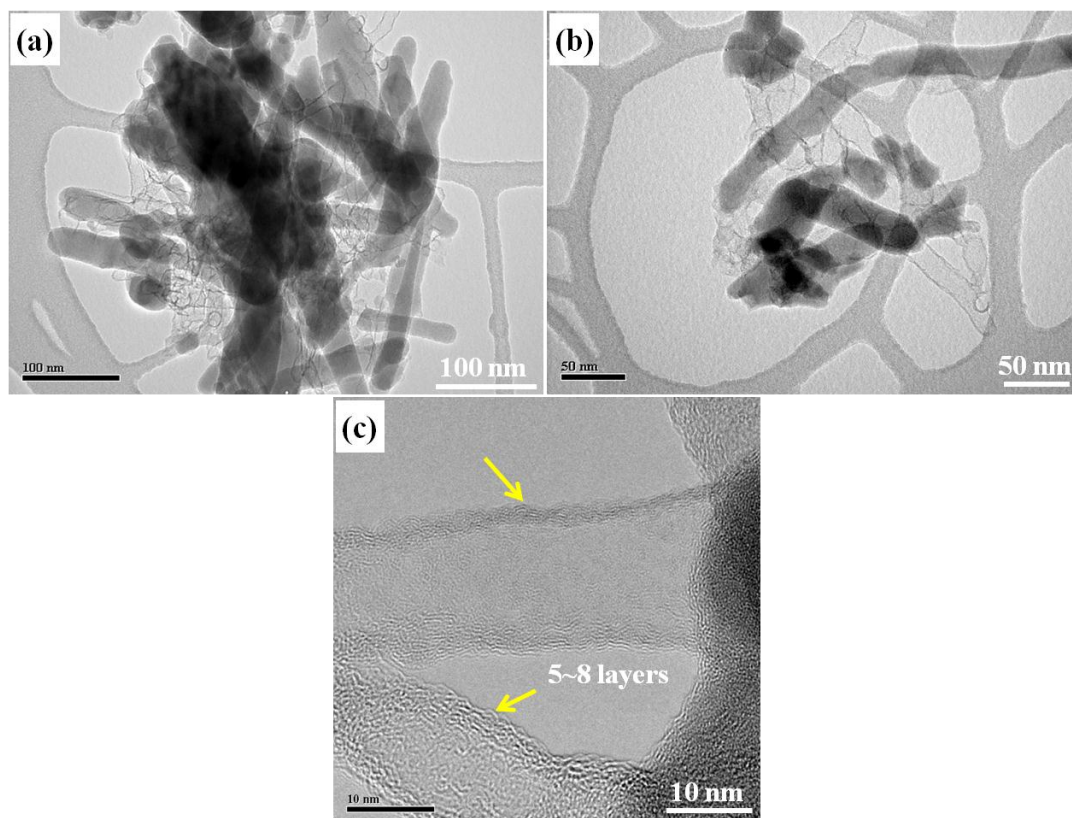

**Figure S1.** TEM image (a), (b) and HRTEM image (c) of LFP@CNTs nanowires.

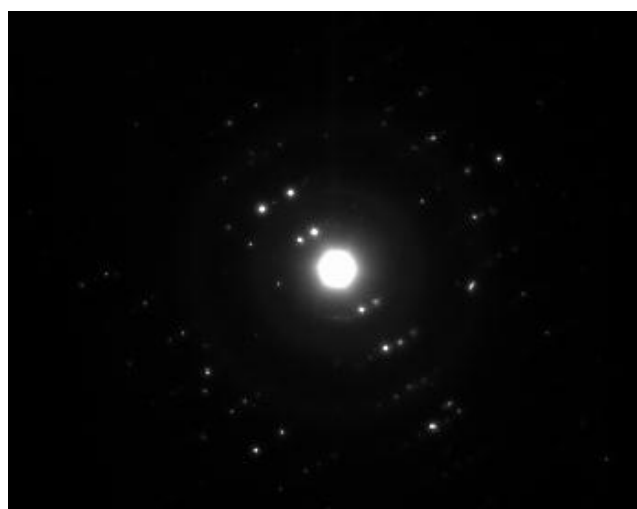

**Figure S2.** Selected-area electron diffraction of core shell LFP@CNTs-10h nanowire.

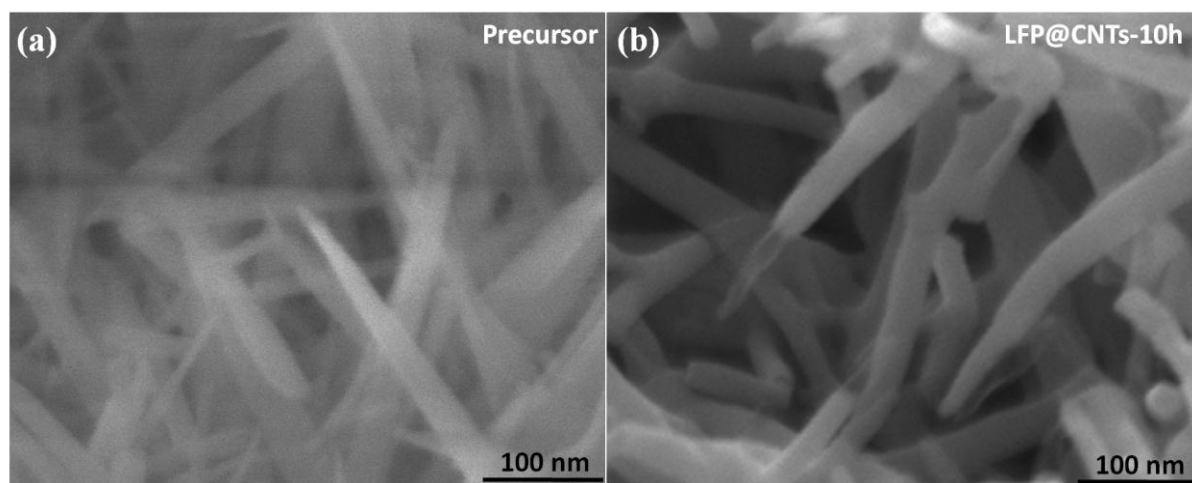

**Figure S3.** SEM images of (a)  $\text{LiFePO}_4$  precursor and (b) LFP@CNTs-10h nanowire.

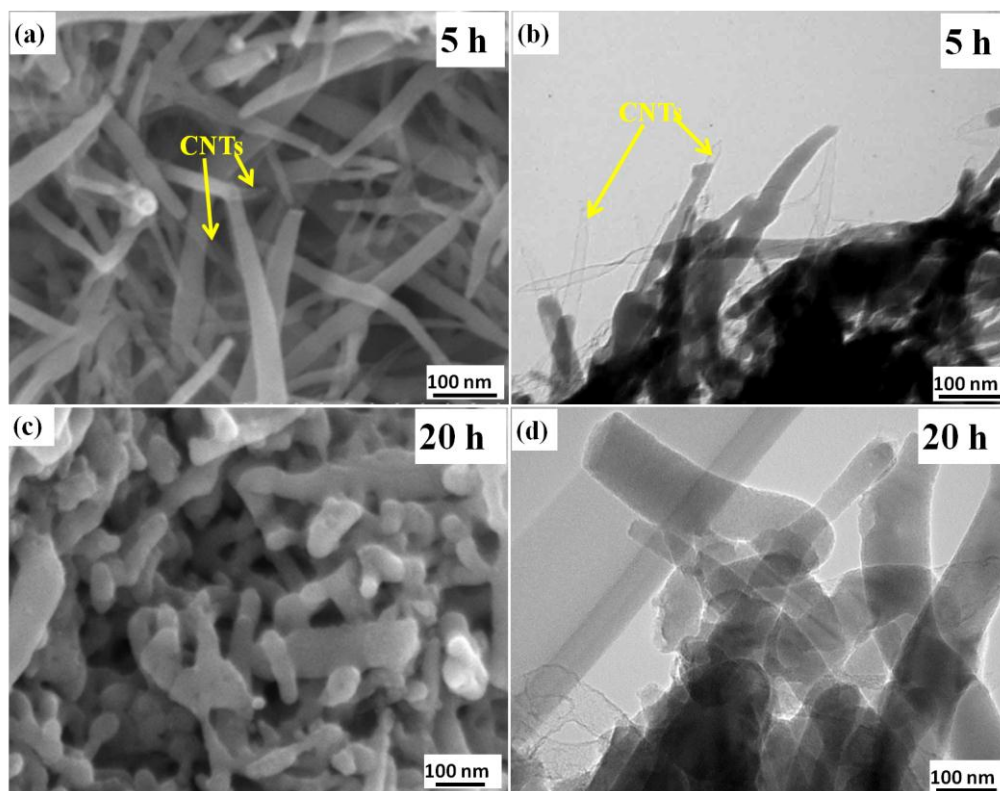

**Figure S4.** SEM image (a) and TEM image (b) of core-shell LFP@CNTs-5h; SEM image (c) and TEM image (d) of LFP@CNTs-20h nanorod.

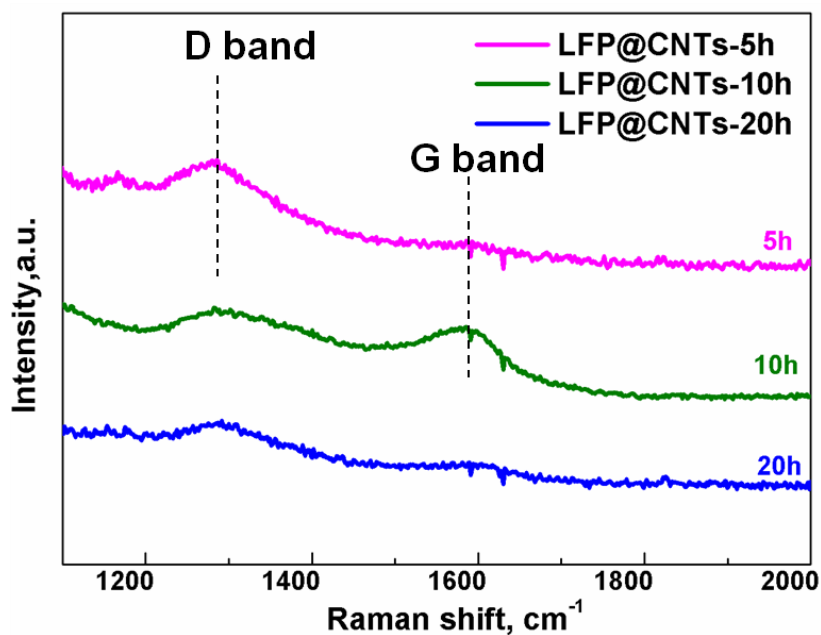

Figure S5. Raman spectrum of LFP@CNTs composites annealed at different time.

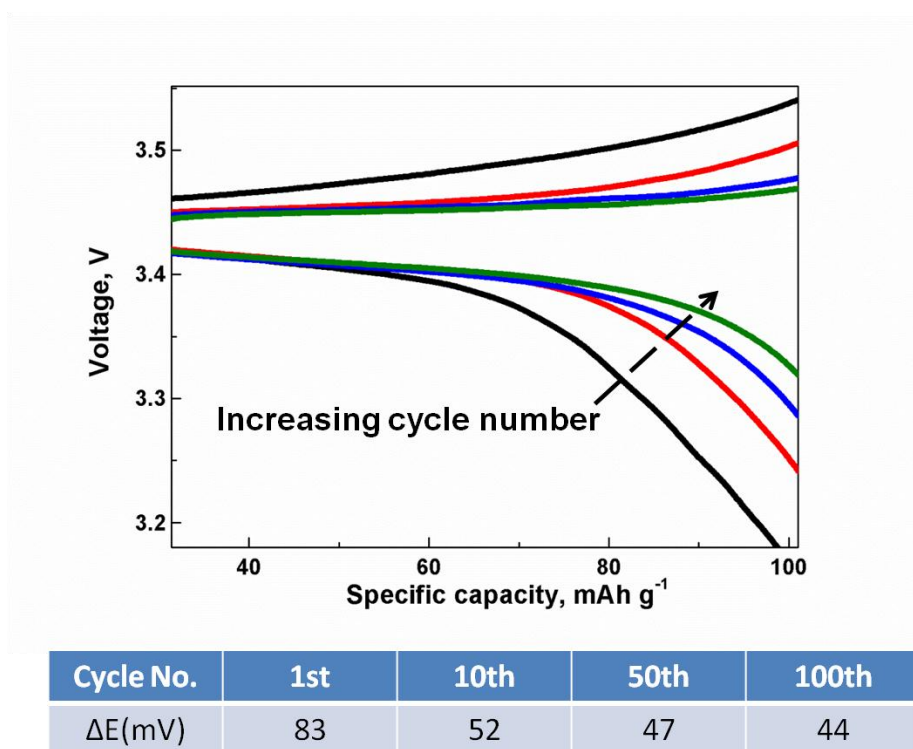

Figure S6. Charge-discharge galvanostatic curves for different cycles ( 1st, 10th, 50th and 100th ).
